# Supplementary material for: Purification and production of Plasmodium falciparum zygotes from in vitro culture using magnetic column and Percoll density gradient
Source: Springer Nature journal article supplement (doi:10.1186/s12936-020-03237-1), 2020-05-25
Supplement: MOESM2 [file 18011218]

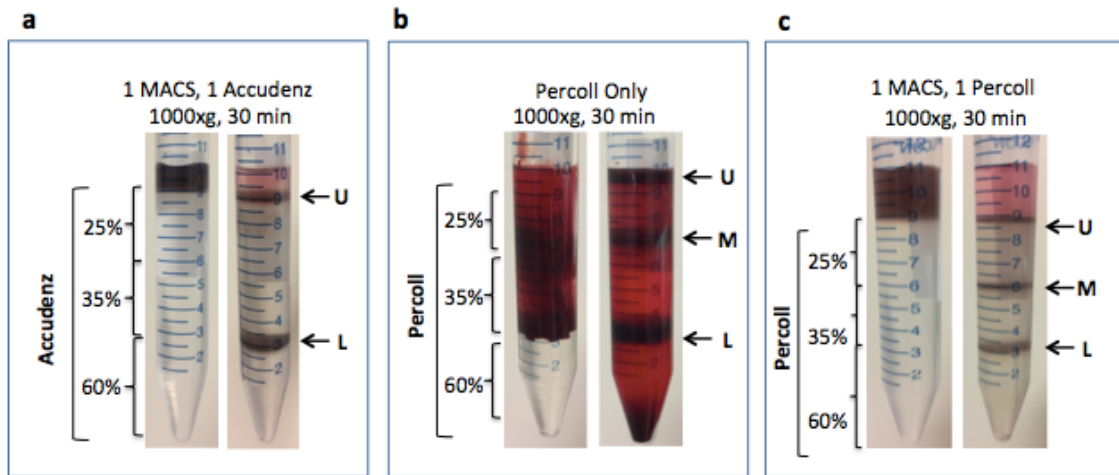

**Figure S2.** Percoll gradients of other purification method. **a** Accudenz gradient after 1st MACS column purification. **b** Percoll gradient without using MACS purification. **c** Percoll gradient after 1 MACS column. *U* upper band, *M* middle band, *L* lower band.
