# Supplementary material for: Purification and production of Plasmodium falciparum zygotes from in vitro culture using magnetic column and Percoll density gradient
Source: Springer Nature journal article supplement (doi:10.1186/s12936-020-03237-1), 2020-05-25
Supplement: MOESM5 [file 18011218]

**Table S3: Enrichment of zygotes during purification using “1 MACS 1 Percoll” method**

| Parasite/Cell | Before Purification  | After Column        | Percoll, 1000xg, 30 min |                      |                     |
|---------------|----------------------|---------------------|-------------------------|----------------------|---------------------|
|               |                      |                     | upper band              | middle band          | lower band          |
| RBC           | 9.0x10 <sup>9</sup>  | 4.0x10 <sup>6</sup> | 0                       | 0                    | 2.0x10 <sup>5</sup> |
| Gam           | 1.5x10 <sup>8</sup>  | 1.2x10 <sup>7</sup> | 1.0x10 <sup>5</sup>     | 5.0x10 <sup>5</sup>  | 2.7x10 <sup>6</sup> |
| Zygote        | 2.4x10 <sup>8</sup>  | 1.8x10 <sup>7</sup> | 4.0x10 <sup>6</sup>     | 4.2x 10 <sup>6</sup> | 2.1x10 <sup>6</sup> |
| Mac Gam       | 1.4 x10 <sup>8</sup> | 4.8x10 <sup>6</sup> | 4.0x10 <sup>5</sup>     | 3.0x10 <sup>5</sup>  | 6.0x10 <sup>5</sup> |
| Zygote %      | 2.5%                 | 46.4%               | 88.9%                   | 84.0%                | 37.5%               |

Absolute total numbers of RBCs and different parasite stages before and after each purification step are shown. Enrichment of zygotes is indicated by the percentage of zygotes in the whole population after each purification step (Zygote %). RBC = red blood cells; Gam = gametocytes; Mac Gam = macrogametocytes.
