# Supplementary material for: Purification and production of Plasmodium falciparum zygotes from in vitro culture using magnetic column and Percoll density gradient
Source: Springer Nature journal article supplement (doi:10.1186/s12936-020-03237-1), 2020-05-25
Supplement: MOESM7 [file 18011218]

**Table S5: Transformation of zygotes into ookinetes after purification**

| Parasite/Cell | 1 MACS 1<br>Accudenz | 1 MACS 1 Percoll  |                   |                   |
|---------------|----------------------|-------------------|-------------------|-------------------|
|               | upper band           | upper band        | middle band       | lower band        |
| Zygote        | $2.0 \times 10^6$    | $4.0 \times 10^6$ | $4.2 \times 10^6$ | $2.1 \times 10^6$ |
| Ookinete      | $1.1 \times 10^5$    | $2.2 \times 10^5$ | $1.2 \times 10^5$ | $1.1 \times 10^5$ |
| P trans (z-o) | 5.5%                 | 5.5%              | 2.9%              | 5.2%              |

Absolute total number of zygotes after 1 MACS 1 Accudenz or 1 MACS 1 Percoll purification are shown. The number of ookinetes after transformation and percentage of zygotes that transformed into ookinetes are also given. P trans (z-o) = percent transformation, zygote to ookinete.
